# Supplementary material for: Catalyst-free ultrasonic-promoted multicomponent synthesis of tertiary α-amino phosphonates
Source: Royal Society of Chemistry journal article supplement (doi:10.1039/c7nj00944e), 2017-01-01
Supplement: c7nj00944e1.pdf [file c7nj00944e1.pdf]

## Supporting Information

# Catalyst-free ultrasonic-promoted multicomponent synthesis of tertiary $\alpha$ -amino phosphonates

Reddi Mohan Naidu Kalla, Jaeyeong Bae, and Il Kim\*

BK21 PLUS Center for Advanced Chemical Technology, Department of Polymer Science and Engineering, Pusan National University, Busan 609-735, Republic of Korea

Page

|                                                                                                                                                               |                |
|---------------------------------------------------------------------------------------------------------------------------------------------------------------|----------------|
| <b>1. <math>^{13}\text{C}</math> NMR spectrum for crude and purified <math>\alpha</math>-hydroxy phosphonates</b>                                             | <b>II</b>      |
| <b>2. <math>^1\text{H}</math> NMR spectrum for reaction mixture at various time intervals</b>                                                                 | <b>III</b>     |
| <b>3. <math>^1\text{H}</math>, and <math>^{13}\text{C}</math> NMR spectra for the synthesis of imine</b>                                                      | <b>III</b>     |
| <b>4. <math>^1\text{H}</math>, <math>^{13}\text{C}</math>, and <math>^{31}\text{P}</math> NMR spectra for Tertiary <math>\alpha</math>-amino phosphonates</b> | <b>IV–XXIX</b> |



**Fig. S1.** <sup>13</sup>C NMR spectra of (A) crude mixture of benzaldehyde, diethyl phosphite and dibutylamine after 20 min, and (B) purified  $\alpha$ -hydroxyphosphonates after 24 h.



**Fig. S2.**  $^1\text{H}$  NMR spectra of the reaction mixture at various time intervals



**Fig. S3.**  $^1\text{H}$  NMR (A) and  $^{13}\text{C}$  NMR (B) spectra for imine synthesis.

3.  $^1\text{H}$ ,  $^{13}\text{C}$ , and  $^{31}\text{P}$  NMR spectra for the TAPs





**Fig. S4.**  $^1\text{H}$  NMR (A),  $^{13}\text{C}$  NMR (B), and  $^{31}\text{P}$  NMR (C) spectra of compound 1.





Fig. S5.  $^1\text{H}$  NMR (A),  $^{13}\text{C}$  NMR (B), and  $^{31}\text{P}$  NMR (C) spectra of compound 2.





Fig. S6.  $^1\text{H}$  NMR (A),  $^{13}\text{C}$  NMR (B), and  $^{31}\text{P}$  NMR (C) spectra of compound 3.





**Fig. S7.**  $^1\text{H}$  NMR (A),  $^{13}\text{C}$  NMR (B), and  $^{31}\text{P}$  NMR (C) spectra of compound 4.





**Fig. S8.**  $^1\text{H}$  NMR (A),  $^{13}\text{C}$  NMR (B), and  $^{31}\text{P}$  NMR (C) spectra of compound 5.





Fig. S9.  $^1\text{H}$  NMR (A),  $^{13}\text{C}$  NMR (B), and  $^{31}\text{P}$  NMR (C) spectra of compound 6.





Fig. S10.  $^1\text{H}$  NMR (A),  $^{13}\text{C}$  NMR (B), and  $^{31}\text{P}$  NMR (C) spectra of compound 7.





**Fig. S11.**  $^1\text{H}$  NMR (A),  $^{13}\text{C}$  NMR (B), and  $^{31}\text{P}$  NMR (C) spectra of compound **8**.





Fig. S12.  $^1\text{H}$  NMR (A),  $^{13}\text{C}$  NMR (B), and  $^{31}\text{P}$  NMR (C) spectra of compound 9.





Fig. S13.  $^1\text{H}$  NMR (A),  $^{13}\text{C}$  NMR (B), and  $^{31}\text{P}$  NMR (C) spectra of compound 10.





**Fig. S14.**  $^1\text{H}$  NMR (A),  $^{13}\text{C}$  NMR (B), and  $^{31}\text{P}$  NMR (C) spectra of compound 11.





**Fig. S15.**  $^1\text{H}$  NMR (A),  $^{13}\text{C}$  NMR (B), and  $^{31}\text{P}$  NMR (C) spectra of compound 12.





Fig. S16.  $^1\text{H}$  NMR (A),  $^{13}\text{C}$  NMR (B), and  $^{31}\text{P}$  NMR (C) spectra of compound 13.





Fig. S17. <sup>1</sup>H NMR (A), <sup>13</sup>C NMR (B), and <sup>31</sup>P NMR (C) spectra of compound 14.

(A)



(B)





Fig. S18.  $^1\text{H}$  NMR (A),  $^{13}\text{C}$  NMR (B), and  $^{31}\text{P}$  NMR (C) spectra of compound 15.





**Fig. S19.**  $^1\text{H}$  NMR (A),  $^{13}\text{C}$  NMR (B), and  $^{31}\text{P}$  NMR (C) spectra of compound 16.





**Fig. S20.**  $^1\text{H}$  NMR (A),  $^{13}\text{C}$  NMR (B), and  $^{31}\text{P}$  NMR (C) spectra of compound 17.





**Fig. S21.**  $^1\text{H}$  NMR (A),  $^{13}\text{C}$  NMR (B), and  $^{31}\text{P}$  NMR (C) spectra of compound **18**.

(A)



(B)





**Fig. S22.**  $^1\text{H}$  NMR (A),  $^{13}\text{C}$  NMR (B), and  $^{31}\text{P}$  NMR (C) spectra of compound **19**.









**Fig. S24.**  $^1\text{H}$  NMR (A),  $^{13}\text{C}$  NMR (B), and  $^{31}\text{P}$  NMR (C) spectra of compound **21**.





Fig. S25. <sup>1</sup>H NMR (A), <sup>13</sup>C NMR (B), and <sup>31</sup>P NMR (C) spectra of compound 22.





**Fig. S26.**  $^1\text{H}$  NMR (A),  $^{13}\text{C}$  NMR (B), and  $^{31}\text{P}$  NMR (C) spectra of compound **23**.





**Fig. S27.**  $^1\text{H}$  NMR (A),  $^{13}\text{C}$  NMR (B), and  $^{31}\text{P}$  NMR (C) spectra of compound 24.
